# Supplementary material for: In situformation/carbonization of quinone-amine polymers towards hierarchical porous carbon foam with high faradaic activity for energy storage
Source: Royal Society of Chemistry journal article supplement (doi:10.1039/c7ta09644e), 2018-01-01
Supplement: c7ta09644e1.pdf [file c7ta09644e1.pdf]

## Supporting Information

### ***In-situ* formation/carbonization of quinone-amine polymers towards hierarchical-pore carbon foam with high faradaic activity for energy storage**

Yu Zhang,<sup>a</sup> Tingting Qu,<sup>a</sup> Kun Xiang,<sup>a</sup> Yu Shen,<sup>a</sup> Shanyong Chen,<sup>a</sup> Mingjiang Xie,<sup>\*b</sup> and Xuefeng Guo<sup>\*ab</sup>

<sup>a</sup>Key Lab of Mesoscopic Chemistry, School of Chemistry and Chemical Engineering, Nanjing University, Nanjing, 210023, China

<sup>b</sup>Hubei Key Laboratory for Processing and Application of Catalytic Materials, Huanggang Normal University, Huanggang, 438000, China

\*Corresponding authors.

E-mail addresses: guoxf@nju.edu.cn, xiemingjiang@hotmail.com

### Figures and tables

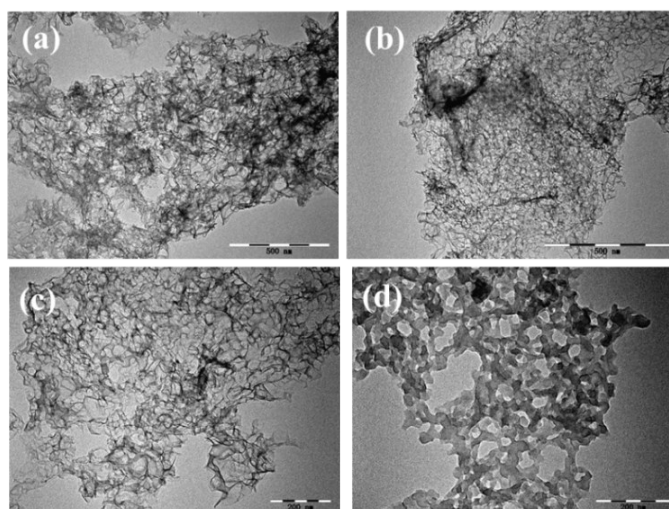

**Fig. S1** TEM images of the carbonized PAQ at different temperature. (a) 650 °C, (b) 750 °C, (c) 850 °C, and (d) PAQ without carbonization.

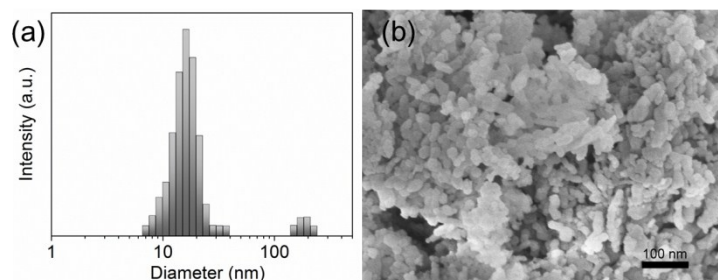

**Fig.S2** (a) particle size distributions of MgO measured by dynamic light scattering. (b) SEM image of MgO.

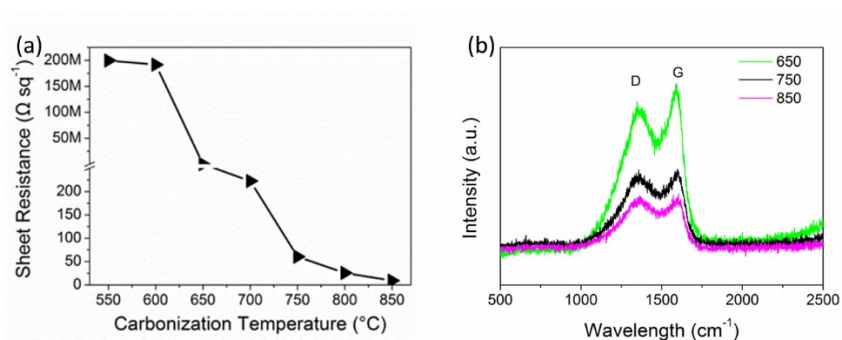

**Fig. S3** (a) Sheet resistances and (b) Raman spectra of the N,O-PCFs carbonized at different temperature.

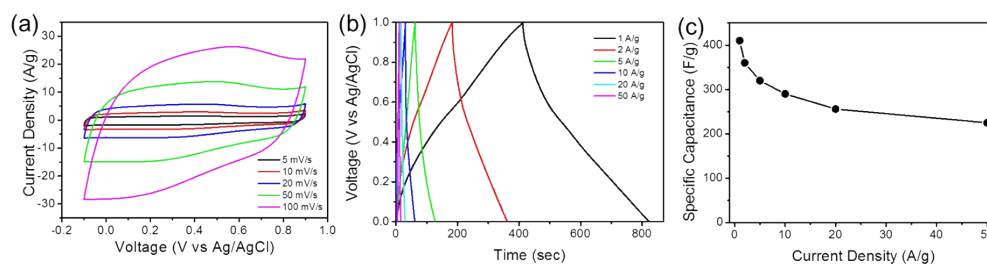

**Fig. S4** Three-electrode system electrochemical test of N,O-PCF750. (a) CV curves at different scan rates. (b) CP curves at different current densities. (c) Specific capacitance versus current density.

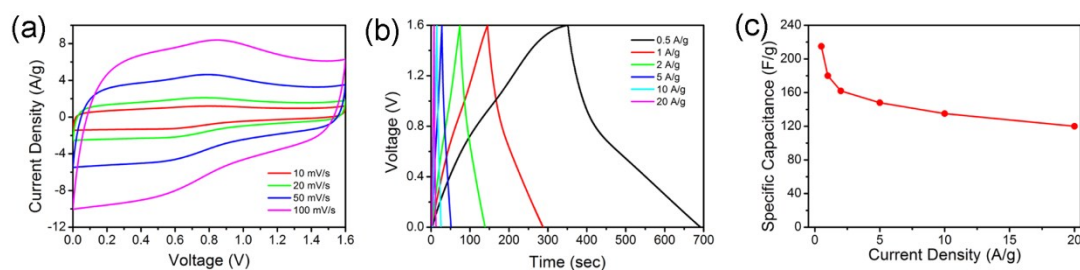

**Fig. S5** The symmetrical supercapacitor electrochemical measurements of N,O-PCF750 in 1M Li<sub>2</sub>SO<sub>4</sub>. (a) CV curves at different scan rates. (b) CP curves at different current densities. (c) Specific capacitance versus current density.

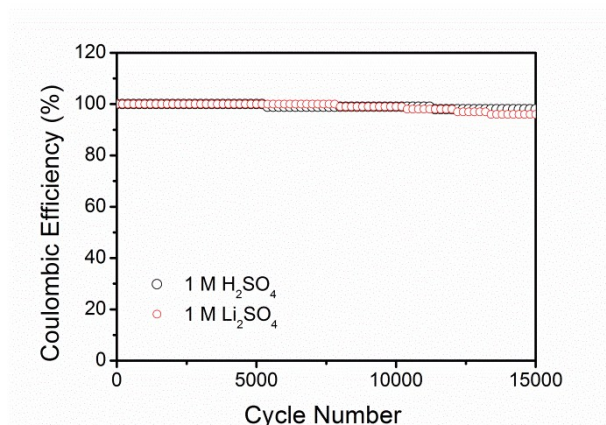

**Fig. S6** The Coulombic efficiency of symmetrical supercapacitors.

**Table S1** BET surface area, resistance, and oxygen and nitrogen content obtained by XPS and element analysis of the N,O-PCFs carbonized at different temperature.

| Carbonization Temperature/°C                   | 650                  | 750   | 850  |
|------------------------------------------------|----------------------|-------|------|
| BET Surface Area (m <sup>2</sup> /g)           | 861                  | 1215  | 931  |
| Resistance (Ω/sq)                              | 4.57×10 <sup>4</sup> | 60.55 | 9.18 |
| Content of Oxygen (at.%) by XPS                | 6.10                 | 5.24  | 5.11 |
| Content of Nitrogen (at.%) by XPS              | 7.56                 | 7.02  | 4.12 |
| Content of Oxygen (at.%) by element analysis   | 6.33                 | 5.31  | 5.19 |
| Content of Nitrogen (at.%) by element analysis | 8.05                 | 7.18  | 4.68 |

**Table S2** The relative contents of nitrogen and oxygen species of N,O-PCF750 calculated by the XPS fitting peak area.

| N species             | Pyridinic | Pyrrolic | Graphitic | Pyridine-N-oxide |      |
|-----------------------|-----------|----------|-----------|------------------|------|
| Relative contents (%) | 13.9      | 38.8     | 44.3      | 3.0              |      |
| O species             | Quinone O | -COOH    | -C=O      | -C-O             | -OH  |
| Relative contents (%) | 25.8      | 14.9     | 31.7      | 14.3             | 13.3 |

**Table S3** Comparison to the recently reported heteroatom-doped carbon-based electrode materials for symmetrical supercapacitors in aqueous electrolyte

| Electrode Materials | Electrolyte                         | Specific Capacitance | Energy Density         | Cycling Stability | Ref. |
|---------------------|-------------------------------------|----------------------|------------------------|-------------------|------|
| PpPD/graphene       | 1 M H <sub>2</sub> SO <sub>4</sub>  | 248 F/g@2 A/g        | 8.6 Wh/kg@0.5 kW/kg    | 72%,1000@10A/g    | [44] |
| 3D graphene         | 1 M H <sub>2</sub> SO <sub>4</sub>  | 250 F/g@1 A/g        | 8.9 Wh/kg@0.05 kW/kg   | -                 | [45] |
| NMCNF               | 2 M Li <sub>2</sub> SO <sub>4</sub> | -                    | 12.5 Wh/kg@0.072 kW/kg | 85%,1000@5A/g     | [38] |
| hNCNC               | 6 M KOH                             | 313 F/g@1 A/g        | 10.9 Wh/kg@0.25 kW/kg  | 98%,20000@10A/g   | [24] |
| N-carbon nanofiber  | 1 M H <sub>2</sub> SO <sub>4</sub>  | 220 F/g@0.25 A/g     | 5.9 Wh/kg@1.2 kW/kg    | 106%,20000@1A/g   | [46] |
| RGO-HD              | 6 M KOH                             | 182 F/g@1 A/g        | 4.4 Wh/kg@0.25 kW/kg   | 99%,4000@10A/g    | [47] |
| FT-PNCNF            | 1 M KOH                             | 247 F/g@10 mV/s      | -                      | 95%,8000@0.5V/s   | [48] |
| N,S-PCN             | 1 M Na <sub>2</sub> SO <sub>4</sub> | 187 F/g@0.2 A/g      | 21 Wh/kg@0.18 kW/kg    | 99.7%,10000@2A/g  | [49] |
| N-graphene          | 6 M KOH                             | 312 F/g@0.1 A/g      | -                      | 100%,1000@10A/g   | [50] |
| HPCF                | 6 M KOH                             | 158 F/g@0.1 A/g      | 9.1 Wh/kg@3.5 kW/kg    | -                 | [51] |
| N, O-PCF            | 1 M H <sub>2</sub> SO <sub>4</sub>  | 321 F/g@1 A/g        | 11.51 Wh/kg@0.25 kW/kg | 97%,20000@5A/g    | This |
|                     | 1 M Li <sub>2</sub> SO <sub>4</sub> | 216 F/g@0.5 A/g      | 15.91 Wh/kg@0.4 kW/kg  | 96%,15000@5A/g    | work |
